# Supplementary material for: A graphene quantum dot/phthalocyanine conjugate: a synergistic catalyst for the oxygen reduction reaction
Source: Royal Society of Chemistry journal article supplement (doi:10.1039/c6ra27873f), 2017-01-01
Supplement: c6ra27873f1.pdf [file c6ra27873f1.pdf]

**Electronic Supplementary Information (ESI)**

**Graphene Quantum Dot/Phthaocyanine Conjugate:**

**A Synergistic Catalyst for the Oxygen Reduction Reaction**

Ki Hwan Koh,<sup>a</sup> Sung Hyun Noh,<sup>a</sup> Tae-Hyun Kim,<sup>b</sup> Won Jun Lee,<sup>c</sup> Sung-Chul Yi,<sup>b\*</sup> Tae Hee Han<sup>a\*</sup>

*a. Department of Organic and Nano Engineering, Hanyang University, 222 Wangsimni-Ro, 04763, Seoul, Republic of Korea*

*b. Department of Chemical Engineering, Hanyang University, 222 Wangsimni-Ro, 04763, Seoul, Republic of Korea*

*c. Department of Chemistry, Imperial College London, London, SW7 2AZ, United Kingdom.*

Corresponding authors: S.C.Y. (scyi@hanyang.ac.kr); T.H.H. (than@hanyang.ac.kr)

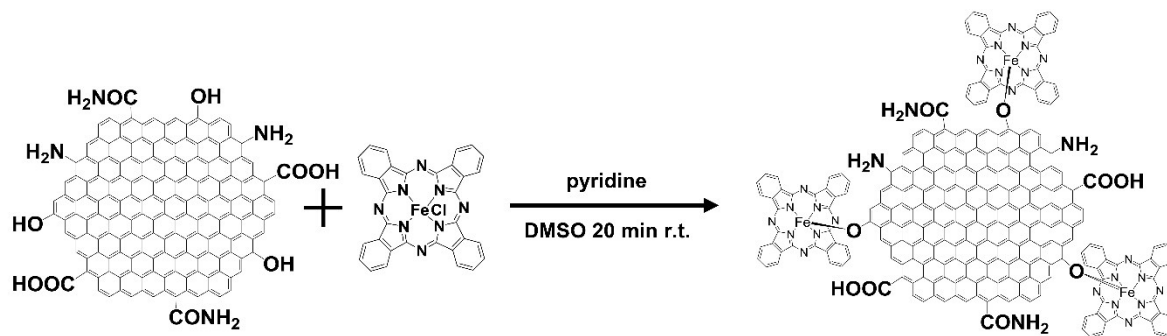

Fig. S1 A schematic conjugation process of GQD and FePC.

a

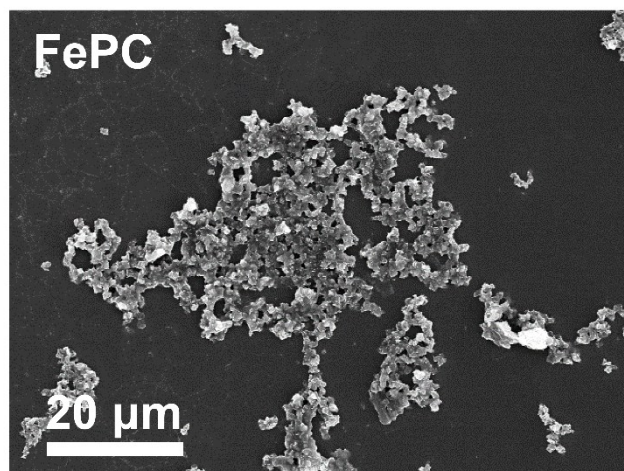

b

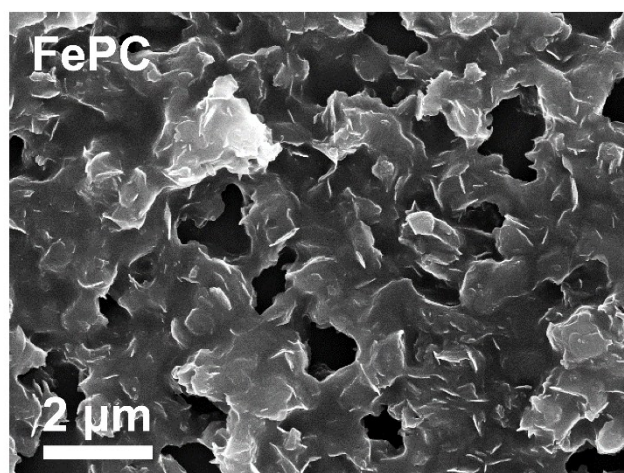

Fig. S2 SEM images of a) FePC and b) magnified FePC

**Table S1.** Comparison of performance values for this work with other previously reported works. The onset potential values have been rescaled to V vs RHE in 0.1M KOH.

| Sample                                              | Onset potential (V) | Electron transfer number (n) | Reference |
|-----------------------------------------------------|---------------------|------------------------------|-----------|
| GQD-FePC                                            | 0.88                | 3.77                         | This work |
| Carboxyl acid/sulfonic acid functionalized graphene | 0.81                | 2.2-3.8                      | 1         |
| Edge-selectively sulfurized graphene nanoplatelets  | 0.75                | 3.3                          | 2         |
| PDDA-Graphene                                       | 0.86                | 3.5-4                        | 3         |
| PDDA-ACNT                                           | 0.89                | 3.72                         | 4         |
| Cu/GQD                                              | 0.85                | 3.64                         | 5         |
| Plasma-treated Graphene                             | 0.87                | 3.85                         | 6         |

**Table S2.** Comparison of stability values for this work with other previously reported works. Current-time (i-t) chronoamperometric responses in O<sub>2</sub>-saturated KOH electrolytes.

| Sample                                     | Time (s) | Relative current (%) | Reference |
|--------------------------------------------|----------|----------------------|-----------|
| GQD-FePC                                   | 17,000   | 90.6                 | This work |
| Fe <sub>3</sub> C@N-CNT                    | 15,000   | 94.0                 | 7         |
| Graphene-FePC                              | 10,000   | 84.0                 | 8         |
| FePC covalently functionalized Graphene    | 10,000   | 83.5                 | 9         |
| S-doped graphene                           | 30,000   | 73.0                 | 10        |
| N, S-co doped 3D graphene frameworks       | 20,000   | 85.2                 | 11        |
| Co/CoO/CoFe <sub>2</sub> O <sub>4</sub> /G | 20,000   | 80.0                 | 12        |

### Supporting References

1. I-Y. Jeon, H-J. Choi, S-M. Jung, J-M. Seo, M-J. Kim, L. Dai, J-B. Baek, *Journal of the American Chemical Society*, **2013**, 135, 1386-1393.
2. I-Y Jeon, S. Zhang, L. Zhang, H-J. Choi, J-M. Seo, Z. Xia, L. Dai, J-B. Baek, *Advanced Materials*, **2013**, 25, 6138-6145.
3. S. Wang, D. Yu, L. Dai, D. W. Chang, J-B. Baek, *ACS Nano*, **2011**, 5, 6202-6209.
4. D. Yu, Q. Zhang, L. Dai, *Journal of the American Chemical Society*, **2011**, 133, 5282-5185.
5. K. Liu, Y. Song, S. Chen, *International Journal of Hydrogen Energy*, **2016**, 41, 1559-1567.
6. L. Tao, Q. Wang, S. Dou, Z. Ma, J. Huo, S. Wang, L. Dai, *Chemical Communications*, **2016**, 52, 2764-2767.
7. B. Y. Guan, L. Yu, X. W. Lou, *Energy and Environmental Science*, **2016**, 9, 3092-3096
8. Y. Jiang, Y. Lu, X. Lv, D. Han, Q. Zhang, L. Niu, W. Chen, *ACS Catalysis*, **2013**, 3, 1263-1271
9. Y. Liu, Y-Y. Wu, G-J. Lv, T. Pu, X-Q. He, L-L. Cui, *Electrochimica Acta*, **2013**, 112, 269-278

10. S. Yang, L. Zhi, K. Tang, X. Feng, J. Maier, K. Mullen, *Advanced Functional Materials*, **2012**, 22, 3634-3640
11. Y. Su, Y. Zhang, X. Zhuang, S. Li, D. Wu, F. Zhang, X. Feng, *Carbon*, **2013**, 62, 296-301
12. R. Huo, W-J. Jiang, S. Xu, F. Zhang, J-S. Hu, *Nanoscale*, **2014**, 6, 203-206
